1 **Mutational impact of chronic alcohol use on stem cells in cirrhotic liver**

2 Myrthe Jager<sup>1</sup>

3 Ewart Kuijk<sup>1</sup>

4 Ruby Lieshout<sup>2</sup>

5 Mauro D. Locati<sup>1</sup>

6 Nicolle Besselink<sup>1</sup>

7 Bastiaan van der Roest<sup>1</sup>

8 Roel Janssen<sup>1</sup>

9 Sander Boymans<sup>1</sup>

10 Jeroen de Jonge<sup>2</sup>

11 Jan N.M. IJzermans<sup>2</sup>

12 Michael Doukas<sup>3</sup>

13 Monique M.A. Verstegen<sup>2</sup>

14 Ruben van Boxtel<sup>1,†</sup>

15 Luc J.W. van der Laan<sup>2</sup>

16 Edwin Cuppen<sup>1,#</sup>

17

18 <sup>1</sup>Center for Molecular Medicine and Oncode Institute, University Medical Center Utrecht, Utrecht

19 University, Heidelberglaan 100, 3584 CX Utrecht, The Netherlands

20 <sup>2</sup>Department of Surgery, Erasmus MC - University Medical Center, Wytemaweg 80, 3015 CN

21 Rotterdam, The Netherlands

22 <sup>3</sup>Department of Pathology, Erasmus MC - University Medical Center, Wytemaweg 80, 3015 CN

23 Rotterdam, The Netherlands

24 <sup>†</sup>Present address: Oncode Institute and Princess Máxima Center for Pediatric Oncology, 3584 CT

25 Utrecht, The Netherlands

26 <sup>#</sup>Corresponding author: [ecuppen@umcutrecht.nl](mailto:ecuppen@umcutrecht.nl)

## 27 **ABSTRACT**

28 Excessive alcohol consumption increases the risk of developing liver cancer, but the  
29 mechanism through which alcohol drives carcinogenesis is as yet unknown. Here, we  
30 determined the mutational consequences of chronic alcohol use on the genome of human liver  
31 stem cells prior to cancer development. No change in base substitution rate or spectrum could  
32 be detected. Analysis of the trunk mutations in an alcohol-related liver tumor by multi-site  
33 whole-genome sequencing confirms the absence of specific alcohol-induced mutational  
34 signatures driving the development of liver cancer. However, we did identify an enrichment of  
35 nonsynonymous base substitutions in cancer genes in stem cells of the cirrhotic livers, such as  
36 recurrent nonsense mutations in *PTPRK* that disturb Epidermal Growth Factor (EGF)-  
37 signaling. Our results thus suggest that chronic alcohol use does not contribute to  
38 carcinogenesis through altered mutagenicity, but instead induces microenvironment changes  
39 which provide a ‘fertile ground’ for selection of cells with oncogenic mutations.

40

## 41 **INTRODUCTION**

42 Alcohol consumption is an important risk factor for the development of various cancer types,  
43 including hepatocellular carcinoma (HCC), and causes an estimated 400,000 cancer-related  
44 deaths worldwide each year<sup>1-3</sup>. In spite of the clear link between alcohol intake and  
45 tumorigenesis, the underlying mechanism remains debated and mainly revolves around two  
46 hypotheses. The first hypothesis suggests that alcohol consumption may contribute to the  
47 development of cancer through an increased mutation accumulation in the genome<sup>4</sup>.  
48 Consistently, the first metabolite of ethanol, acetaldehyde, is highly carcinogenic<sup>5-7</sup> and can  
49 also contribute to the formation of mutagenic reactive oxygen species (ROS)<sup>8-11</sup>. Analysis of a  
50 large number of tumor exomes and genomes showed that alcohol intake is associated with an  
51 increased mutation load and different mutational characteristics<sup>12-15</sup>. The second hypothesis

52 suggests that an alcohol-induced change of microenvironment is an essential driver for  
53 tumorigenesis by providing a fertile ground for cells with oncogenic mutations<sup>16-18</sup>. Indeed,  
54 development of HCC is preceded by chronic inflammation and cirrhosis in about 80% of  
55 patients and this cell-extrinsic damage appears a prerequisite for the formation of the majority  
56 of liver cancers<sup>18-20</sup>. Additionally, Hepatitis C Virus (HCV)-induced cirrhotic livers show an  
57 increase in the number and size of clonal patches with mutations in genes that are frequently  
58 mutated in HCC<sup>21</sup>. Alcohol use itself has been associated with an increased number of cancer-  
59 stem-cell-like epithelial cell adhesion molecule (EpCAM)-positive cells in the cirrhotic liver<sup>22</sup>,  
60 which may be driven by epithelial to mesenchymal transition through activation of the Wnt  
61 pathway<sup>23</sup>, confirming that cellular composition changes can be induced by alcohol use. Yet,  
62 it is still uncertain whether an altered cellular environment is sufficient to drive the  
63 development of cancer, or whether an increase in the mutation load is also required. The here  
64 mentioned hypotheses are thus not mutually exclusive.

65 We have demonstrated previously that mutations accumulate linearly with age in liver  
66 adult stem cells (ASCs) of healthy individuals, without controlling for lifestyle<sup>24,25</sup>. Stem cells  
67 are believed to be an important cell-of-origin for several cancer types, including liver  
68 cancer<sup>18,26-28</sup>, although liver cancer can also originate in differentiated cells<sup>29-31</sup>. Here, we  
69 studied the accumulation of mutations in ASCs from non-cancerous, cirrhotic livers of patients  
70 with a history of chronic alcohol use and compared these to the mutational patterns of healthy  
71 liver donors and to mutations that accumulated in the most recent common ancestor (MRCA)  
72 cell of an alcohol-related HCC.

73

## 74 **RESULTS**

### 75 **Mutation load similar in alcoholic liver**

76 We sequenced the genomes of eight independent clonal organoid cultures derived from  
77 biopsies of five non-cancerous, cirrhotic livers from patients with a known history of chronic  
78 alcohol intake who were undergoing a liver transplantation (further referred to as ‘alcoholic  
79 livers’; Supplementary Table 1). To gain insight into the mutational consequences of chronic  
80 alcohol consumption, the somatic mutation catalogs of alcoholic livers were compared to those  
81 obtained previously from whole genome sequencing (WGS) data of five healthy liver donors  
82 (further referred to as ‘healthy livers’)<sup>24</sup>. To increase the number of healthy liver donors and to  
83 obtain age-matched healthy controls, five clonal liver organoid cultures derived from four  
84 additional healthy liver donors with ages ranging from 24 to 68 years were included in the  
85 analyses (Supplementary Table 1).

86 In total, we identified 42,093 base substitutions, 1,931 indels, and 5 copy number  
87 alterations (CNAs) (Fig. 1; Supplementary Fig. 1; Supplementary Table 1). Consistent with  
88 previous observations<sup>24</sup>, there is a positive relationship between somatic base substitutions and  
89 age in healthy liver ASCs (two-tailed *t*-test, linear mixed model,  $P < 0.05$ ; Fig. 1a). Healthy  
90 liver ASCs acquired ~39.4 (95% confidence interval (95% CI): 30.5 - 48.3) somatic base  
91 substitutions each year. The mutation load in alcoholic liver ASCs (Fig. 1a) was similar to, and  
92 within the 95% CI of the slope estimate of, age-matched healthy liver ASCs. Alcohol  
93 consumption did not affect the number of tandem base substitutions acquired in the genomes  
94 of liver ASCs either (Supplementary Fig. 1a). Furthermore, indels also accumulated with age  
95 at a comparable rate in healthy and alcoholic liver ASCs (two-tailed *t*-test, linear mixed model,  
96  $P < 0.05$ ; Supplementary Fig. 1b). Finally, a minority of the healthy liver ASCs and none of  
97 the assessed alcoholic liver ASCs acquired a CNA, although few CNAs were detected  
98 (Supplementary Table 1)<sup>24</sup>. At the chromosomal level we observed trisomy 22 in a healthy  
99 liver ASC from a 68-year-old healthy female donor and chromosome Y gain in an alcoholic  
100 liver ASC from a 67-year-old male donor (Supplementary Fig. 1c). This suggests that

101 aneuploidies may occur in liver ASCs of older individuals, but this seems to be unrelated to  
102 alcohol consumption. Taken together, these results strongly suggest that the induction of HCC  
103 by chronic alcohol consumption is not caused by an altered base substitution, indel, or CNA  
104 accumulation in liver ASCs prior to oncogenesis.

105

#### 106 **Mutation type similar in alcoholic liver**

107 It has been shown that genome-wide patterns of base substitutions reflect past activity of  
108 mutational processes in cells<sup>32</sup>. Previously, alcohol consumption was reported to be associated  
109 with a modest increase of Catalogue Of Somatic Mutations In Cancer (COSMIC) signature 16  
110 mutations, which is characterized by T:A>C:G mutations<sup>32</sup>, in esophageal and liver cancer<sup>12-</sup>  
111 <sup>15</sup>. To identify if excessive alcohol consumption changed the mutational profiles in non-  
112 cancerous liver ASCs, we performed in-depth mutational analyses. The mutational profiles of  
113 healthy liver ASCs were characterized by a high contribution of C:G>A:T, C:G>T:A, and  
114 T:A>C:G mutations (Fig. 1b-c; Supplementary Fig. 2). The mutational profiles of alcoholic  
115 liver ASCs were highly similar to the mutational profiles of healthy liver ASCs (cosine  
116 similarity = 0.99), indicating that chronic alcohol use does not alter the mutational processes  
117 in liver ASCs.

118 To determine whether chronic alcohol use changed the contribution of the known  
119 COSMIC mutational signatures<sup>32-34</sup>, we calculated the contribution of these signatures to the  
120 mutational profiles of all ASCs and, subsequently, performed a bootstrap resampling method  
121 to identify potential significant differences between healthy and alcoholic liver ASCs, similar  
122 as described in Zou *et al.*<sup>35</sup>. COSMIC signatures 5 and 40 could explain the majority of the  
123 accumulated base substitutions in both healthy and alcoholic liver (Supplementary Fig. 3).  
124 However, we did not observe a significant change in signature contributions between alcoholic

125 liver ASCs and healthy liver ASCs (bootstrap resampling method, see Methods;  
126 Supplementary Fig. 3).

127         A possible explanation for the absence of a correlation between alcohol consumption  
128 and mutational patterns is that the cells that we have sequenced are too early in the precancerous  
129 state. Therefore, we also sequenced five biopsies across a 13 cm HCC of a 60-year-old male  
130 donor with a history of chronic alcohol use and identified mutations that were shared by all  
131 biopsies (Fig. 2a; Supplementary Fig. 4). This approach allowed for the identification of all  
132 mutations in the MRCA and thus provided insight into the mutational process that had been  
133 active prior to tumor formation and in the early to intermediate stages of tumor development  
134 (Fig. 2a). As a control sample, we sequenced a non-tumorous biopsy adjacent to the tumor, to  
135 identify and exclude germline mutations. In total, we identified 19,200 unique somatic base  
136 substitutions across all five HCC biopsies (Supplementary Table 2; Supplementary Fig. 4b).

137         Analysis of the base substitutions shared by all biopsies (trunk mutations) revealed that  
138 the MRCA of these biopsies accumulated 7,203 base substitutions (Supplementary Table 2;  
139 Supplementary Fig. 4b). The mutational profile of the trunk mutations in the HCC was highly  
140 similar to healthy and alcoholic liver ASCs (Fig. 2b; cosine similarity = 0.97 and 0.98,  
141 respectively). These results were in line with our initial observations in ASCs that alcohol itself  
142 does not introduce specific mutations in the genome of liver cells. The high mutation load  
143 suggests that the MRCA already evolved significantly from the cell-of-origin (Fig. 2a) and that  
144 a clonal sweep occurred after a substantial amount of mutations already accumulated.  
145 Consistently, the MRCA already acquired two CNAs (Supplementary Table 3) and several  
146 chromosomal aneuploidies (Fig. 2c; Supplementary Fig. 4c).

147

148 **Cancer driver mutations**

149 Previously, alcohol intake has been shown to accelerate the expansion of clones with cancer  
150 driver mutations in the esophagus<sup>36</sup>. To identify whether chronic alcohol consumption induces  
151 similar changes in the selection of liver cells, we analyzed the genomic distribution of the  
152 acquired base substitutions. If chronic alcohol use would affect cellular selection, the frequency  
153 of somatic mutations in active functional genomic elements would differ between alcoholic  
154 and healthy liver. Base substitutions were, however, depleted to a similar extent in regions  
155 such as genes and enhancers in healthy liver ASCs and alcoholic liver ASCs (Fig. 3a).  
156 Furthermore, unlike previous observations<sup>37</sup>, we did not observe an enrichment of base  
157 substitutions in H3K36me3 regions, associated with active transcription<sup>38,39</sup>, in alcoholic liver  
158 ASCs in comparison to healthy liver ASCs (Supplementary Fig. 5). The normalized ratio of  
159 nonsynonymous to synonymous base substitutions ( $dN/dS$ ) was also  $\sim 1$  in all assessed cell  
160 types (Fig. 3b). Taken together, these results suggest that there is no general change in selection  
161 against more deleterious base substitutions.

162         However, we observed a small enrichment of potential driver mutations in alcoholic  
163 liver ASCs (Fig. 3c; Table 1), although the number of mutations was low. Only one in three  
164 healthy liver ASCs acquired a nonsynonymous base substitution in a COSMIC cancer census  
165 gene. In alcoholic liver ASCs, on the other hand, we observed a total of seven nonsynonymous  
166 base substitutions in these cancer genes across eight ASCs. Two alcoholic liver ASCs even  
167 acquired multiple nonsynonymous hits in cancer genes (Fig. 3c; Table 1), while only an  
168 estimated four nonsynonymous base substitutions in cancer genes is sufficient to drive the  
169 development of liver cancer<sup>16</sup>. Consistent with this idea, we identified four nonsynonymous  
170 base substitutions in cancer genes in the MRCA of the HCC (Fig. 3c; Table 1). The modest  
171 increase in nonsynonymous base substitutions in cancer genes observed in alcoholic liver ASCs  
172 suggests that alcohol may cause clonal outgrowth of cells with putative oncogenic mutations,  
173 similar to alcohol-exposed esophagus<sup>36</sup> and HCV-induced liver cirrhosis<sup>21</sup>.

174 Notably, we found that the cancer gene *PTPRK* was hit by a heterozygous nonsense  
175 base substitution in two alcoholic liver ASCs of independent patients, which is significantly  
176 more than expected based on the background mutation rate adjusted for the mutational profile  
177 (Table 1; likelihood ratio test, FDR correction;  $q = 0.02$ )<sup>16</sup>. None of the healthy liver ASCs  
178 acquired a nonsynonymous base substitution in *PTPRK*, nor did we identify nonsynonymous  
179 base substitutions in this gene in healthy ASCs from small intestine or colon<sup>24</sup>. RNA-  
180 sequencing of the organoids revealed that the heterozygous nonsense base substitutions in  
181 *PTPRK* resulted in a significantly reduced expression (Fig. 4;  $P < 0.05$ , negative binomial test),  
182 indicating a gene dosage effect due to nonsense-mediated decay of the mutated allele. *PTPRK*  
183 can modulate EGF-signaling through dephosphorylation of tyrosine residues of the EGFR<sup>40</sup>.  
184 Western blot analysis showed that alcoholic *PTPRK*<sup>WT/\*</sup> cells had increased pERK levels in the  
185 absence of EGF, indicating that the *PTPRK* mutations indeed disturb EGF-signaling (Fig. 4).

186

## 187 **DISCUSSION**

188 In this study, we aimed to identify the mutational consequences of chronic alcohol intake in  
189 cirrhotic livers, prior to the development of liver cancer. In contrast to previous studies<sup>12–15,37</sup>,  
190 we did not observe specific mutational signatures associated with alcohol consumption in stem  
191 cells from non-cancerous cirrhotic livers. This observation can indicate that chronic alcohol  
192 use may only impact directly on mutation accumulation after tumor initiation or it may reflect  
193 very effective negative selection of cells with DNA damage. Alternatively, it should be noted  
194 that tissue-specific liver ASCs may not be the direct cell-of-origin for HCC. Nevertheless, as  
195 the cancer-initiating cells are exposed to the same mutagenic damage as the liver ASCs (and  
196 show the same mutational signatures), our results suggest that alcohol-induced cancer risk is  
197 not caused by altered mutagenesis.



198           We propose that chronic alcohol consumption creates an inflamed, cirrhotic liver tissue  
199 environment, which in turn provides a fertile ground for cells with specific oncogenic  
200 mutations to clonally expand. Chronic damage to the liver due to chronic alcohol consumption  
201 causes apoptosis and necrosis of various cells in the liver, such as the hepatocytes, leading to  
202 liver inflammation<sup>41</sup>. As a consequence, tissue-specific ASCs, which are normally quiescent,  
203 will proliferate to aid in the regeneration of the damaged liver<sup>42</sup>. Oncogenic mutations that have  
204 accumulated randomly in ASCs through normal mutational processes could provide a  
205 proliferative advantage under these inflamed conditions at the expense of ‘normal’ ASCs that  
206 do not carry such mutations, while there is too little proliferation under normal conditions for  
207 ASCs with oncogenic mutations to outcompete normal ASCs. In the damaged liver, the  
208 enhanced proliferation of such potential cancer progenitor cells could subsequently result in an  
209 increasing number of mutations that drive tumorigenesis further, as long as inflammation  
210 persists.

211           An illustrative example of this potentially altered selection process in the current study  
212 is the significant enrichment of nonsense base substitutions in EGFR phosphatase *PTPRK* in  
213 alcoholic liver ASCs. Reduced expression of *PTPRK* has been reported to cause enhanced  
214 EGF-signaling and ultimately increases cellular proliferation<sup>40,43,44</sup>. Single-nucleotide  
215 polymorphisms in *EGF* that prolong the half-life of EGF increase the risk of developing HCC  
216 through continued EGF-signaling<sup>17,45,46</sup> and 22% of HCCs carry mutations in genes in the EGF  
217 pathway<sup>47</sup>. Reduced EGF-signaling, on the other hand, significantly decreases tumor formation  
218 in cirrhotic livers from rats<sup>48</sup>. These observations underscore the importance of (disturbed)  
219 EGF-signaling in HCC development. Nonsense mutations in *PTPRK* may thus contribute to  
220 the development of HCC by changing EGF-signaling as well, although further research should  
221 be conducted to identify the significance of our findings in liver cancer.

222           The liver is not the only organ in which inflammation is suggested to contribute to  
223 carcinogenesis. Inflammatory diseases, such as inflammatory bowel disease and pancreatitis,  
224 increase the risk of developing cancer in various tissues<sup>49</sup>. However, it was believed that this  
225 increased risk was at least partially due to a direct induction of mutations in the genome<sup>50</sup>. The  
226 results presented here indicate that alteration of selective mechanisms induced by inflammation  
227 could be more directly involved in the development of cancer. For liver, reversal of the  
228 inflammatory phenotype that precedes cancer might aid in reducing cancer risk in patients with  
229 cirrhotic liver disease due to chronic alcohol use.

230

## 231 **METHODS**

### 232 **Human tissue material**

233 All human tissue biopsies were obtained in the Erasmus MC - University Medical Center  
234 Rotterdam. Liver biopsies from healthy liver donors and patients with alcoholic cirrhosis were  
235 obtained during liver transplantation procedures. All patients were negative for viral infection  
236 and metabolic diseases. The biopsies were collected in cold organ preservation fluid (Belzer  
237 UW Cold Storage Solution, Bridge to Life, London, UK) and transported and stored at 4°C  
238 until use. The liver and tumor biopsies from the hepatocellular carcinoma patient were collected  
239 from a resected specimen and stored at -80°C until use. The acquisition of these liver and tumor  
240 biopsies for research purposes was approved by the Medical Ethical Committee of the Erasmus  
241 Medical Center (MEC-2014-060 and MEC-2013-143). Informed consent was provided by all  
242 patients involved.

243           The biopsies of the HCC were cut into 6µm sections. Subsequently, the tumor  
244 percentage of both ends of each biopsy was determined using HE staining (Supplementary Fig.  
245 6). The tumor percentage of the biopsies was determined by averaging both values. The  
246 remaining slices were used for long-term storage at -80°C or for DNA isolation.

247

## 248 **Generation of clonal liver organoid cultures from human liver biopsies**

249 Organoid cultures from healthy and alcoholic liver tissue material were derived as previously  
250 described<sup>51,52</sup>. After 2 - 3 days, organoids started to appear in the BME. The cultures were  
251 maintained for approximately 2 weeks after isolation, to enrich for ASCs. Subsequently, clonal  
252 organoid cultures were generated from these organoid cultures as described previously<sup>25</sup>. The  
253 organoid cultures were expanded until there was material for WGS.

254

## 255 **Whole-genome sequencing and read alignment**

256 DNA was isolated from all organoid cultures, blood samples, and tissue biopsies using the  
257 Qiasymphony (Qiagen). Whole-genome sequencing libraries were generated from 200 ng of  
258 genomic DNA according to standard Illumina protocols. The organoid cultures and control  
259 samples were sequenced paired-end (2 x 150bp) to a depth of at least 30X coverage using the  
260 Illumina HiSeq Xten. The HCC biopsies were sequenced paired-end (2 x 150bp) to a depth of  
261 at least 60X coverage using the Illumina HiSeq Xten. A 60X depth was required to identify the  
262 somatic base substitutions in the tumor cells, as the biopsies contain ~50% healthy cells  
263 (Supplementary Fig. 6). Whole-genome sequencing was performed at the Hartwig Medical  
264 Foundation in Amsterdam, the Netherlands. The sequence reads were mapped to the human  
265 reference genome GRCh37 using the Burrows–Wheeler Aligner (BWA) tool v0.7.5a<sup>53</sup>  
266 (settings -t, 4, -c, 100, -M).

267

## 268 **Copy number alteration calling and filtering**

269 For the healthy and alcoholic samples without HCC, CNA catalogs were obtained and filtered  
270 by using FreeC v2.7<sup>25,54</sup>. Calls were excluded if the mapping quality of the split reads was 0 on  
271 either sides of the split read. BED-file of blacklist positions is available upon request. For the

272 HCC biopsies, structural variants were called using Manta v.1.1.0<sup>55</sup> with standard settings. We  
273 only considered structural variations of at least 150 base pairs in autosomal the genome with a  
274 manta filter ‘PASS’. Subsequently, the mutation catalogs of all five biopsies were intersected  
275 with a window of 500 bp to obtain the trunk CNAs using bedtools<sup>56</sup>.

276 All CNA calls were inspected manually in the Integrative Genomics Viewer (IGV) to  
277 exclude false-positives with no change in read-depth. The breakpoints were identified manually  
278 in IGV. Finally, the number of genes within the deletions was obtained from  
279 <http://genome.ucsc.edu/>.

280

### 281 **Genome-wide copy number profiles**

282 Genome-wide copy number profiles of the ASCs were estimated by using the output of the  
283 FreeC calls obtained in section ‘Copy number alteration calling and filtering’ prior to filtering.  
284 Subsequently, we calculated the mean copy number across 500,000 bp bins. Copy number of  
285  $\geq 2.8$  was considered a gain and copy number of  $\leq 1.2$  a loss. Genome-wide copy number  
286 profiles of the HCC biopsies and the adjacent liver biopsy were obtained in a similar manner.

287

### 288 **Base substitution calling and filtering**

289 For the organoid cultures, base substitution catalogs were obtained by filtering GATK v3.4-  
290 46<sup>57</sup> variant calls as previously described<sup>25</sup>, with additional removal of variants with a sample-  
291 specific genotype quality  $< 10$  in the control sample, and positions with a sample-specific  
292 genotype quality  $< 99$  in the organoid clone sample. The callable regions, used to define regions  
293 with high confidence base substitutions, were obtained by using the GATK CallableLoci tool  
294 v3.4.46<sup>58</sup> as previously described<sup>25</sup>. BED-file of blacklist positions is available upon request.  
295 All organoids showed a peak at a base substitution VAF of 0.5, confirming that the organoid  
296 samples are clonal (Supplementary Fig. 7). Publicly available variant call format (VCF) files

297 and surveyed bed files of healthy liver ASCs were downloaded from donors 14 - 18 from  
298 [https://wgs11.op.umcutrecht.nl/mutational\\_patterns\\_ASCs/](https://wgs11.op.umcutrecht.nl/mutational_patterns_ASCs/) to allow the comparison between  
299 healthy and alcoholic liver ASCs.

300 For the HCC biopsies, base substitutions were called by using Strelka v1.0.14 with  
301 settings ‘SkipDepthFilters = 0’, ‘maxInputDepth = 250’, ‘depthFilterMultiple = 3.0’,  
302 ‘snvMaxFilteredBasecallFrac = 0.4’, ‘snvMaxSpanningDeletionFrac = 0.75’,  
303 ‘indelMaxRefRepeat = 1000’, ‘indelMaxWindowFilteredBasecallFrac = 0.3’,  
304 ‘indelMaxIntHpolLength = 14’, ‘ssnvPrior = 0.000001’, ‘sindelPrior = 0.000001’, ‘ssnvNoise  
305 = 0.0000005’, ‘sindelNoise = 0.000001’, ‘ssnvNoiseStrandBiasFrac = 0.5’, ‘minTier1Mapq =  
306 20’, ‘minTier2Mapq = 5’, ‘ssnvQuality\_LowerBound = 10’, ‘sindelQuality\_LowerBound =  
307 10’, ‘isWriteRealignedBam = 0’, and ‘binSize = 25000000’. We only considered variations  
308 with a filter ‘PASS’. Subsequently, the mutation catalogs of all five biopsies were intersected  
309 to obtain the trunk mutations using bedtools<sup>56</sup>. We only considered base substitutions on the  
310 autosomal genome that did not overlap with an indel call. Positions that were detected at least  
311 5 times in 1,762 Dutch individuals were removed from these catalogs using the Hartwig  
312 Medical Foundation Pool of Normals (HMF-PON) version 2 (available upon request), to  
313 exclude Dutch germline variations. Only 138 base substitutions are found in four out of five  
314 biopsies, whereas we detect 7,203 base substitutions in all five biopsies (Supplementary Fig.  
315 4), indicating that the majority of the trunk mutations were identified successfully.

316 To exclude that the observed similarities/differences in base substitution load and type  
317 are a consequence of the differences between the filtering pipelines, we also applied the  
318 filtering steps of the HCC samples to the base substitutions in the alcohol liver ASCs. We  
319 observe no obvious differences in base substitution load or type between the alcoholic liver  
320 samples using both filtering pipelines (Supplementary Fig. 8).

321

## 322 **Tumor adjusted allele frequencies**

323 The VAFs of the shared base substitutions (the trunk mutations) were calculated for each  
324 biopsy. Subsequently, we calculated the tumor-adjusted variant allele frequency (TAF) per  
325 biopsy, in which the VAF is divided by the tumor-fraction. Chromosome 1 and chromosome 8  
326 were excluded from these analyses, as these chromosomes deviate from a copy number of two  
327 in the majority of the biopsies (Supplementary Fig. 4). Most biopsies showed a peak around a  
328 TAF of 0.5 (Supplementary Fig. 9), confirming that these base substitutions are clonal in each  
329 sample and that the biopsies share a recent common ancestor.

330

## 331 **Indel calling and filtering**

332 WGS data of previously published samples was obtained from EGAD00001001900. Indels  
333 were called using GATK v3.4-46<sup>57</sup>. We only considered indels that were callable/surveyed on  
334 autosomal chromosomes with one alternative allele and a GATK filter 'PASS'. To remove  
335 false positive calls, indels with a GATK quality score < 250 and/or with a mapping quality <  
336 60 were excluded. Additionally, only indels with a coverage of at least 20X and a GATK  
337 sample-specific quality score of at least 99 in both control and organoid clone sample were  
338 considered. Subsequently, variants with a cosmic and/or a dbSNP id (dbSNP v137.b3730) and  
339 indels that were found in three unrelated control samples (BED-file available upon request)  
340 were excluded. To obtain a catalog of somatic indels, we excluded indels with any evidence in  
341 the reference sample, and that were located within 100 base pairs of an indel that was called in  
342 the reference sample. Finally, we only considered variants with a VAF of  $\geq 0.3$  in the organoid  
343 clone sample.

344

## 345 **(Tandem) base substitution and indel rate in liver ASCs**

346 The number of base substitutions in the genomes of liver ASCs was obtained from the VCF  
347 files and extrapolated to the non-N autosomal genome (2,682,655,440 bp) of GRCh37 using  
348 the callable/surveyed genome size obtained in section ‘Base substitution calling and filtering’.  
349 To identify whether the number of somatic base substitutions acquired in the genomes of liver  
350 ASCs are correlated with the age of the donor, we fitted a linear mixed-effects regression model  
351 with the donor as a random effect in this model using the nlme R package, as described  
352 previously<sup>24</sup>. Two-tailed *t*-tests were performed to determine whether the correlation between  
353 age and number of mutations was significant. The accumulation of base substitutions did not  
354 correlate significantly with age in the alcoholic liver ASCs (~38.6 somatic base substitutions  
355 per year; 95% CI: -51.8 - 128.9; two-tailed *t*-test, linear mixed model, non-significant), most  
356 likely due to the fact that the age-range is much smaller in these donors. Therefore, we obtained  
357 the 95% CI of the healthy liver ASCs from the output of the linear mixed-effects regression  
358 model and determined whether the number of somatic base substitutions acquired in the  
359 genomes of the alcoholic liver ASCs are within this 95% CI.

360 To identify tandem base substitutions, we extracted base substitutions that were called  
361 on two consecutive bases in the GRCh37 human reference genome from the VCF files. Similar  
362 to single base substitutions, we extrapolated this number to the non-N autosomal genome and  
363 determined whether the number of tandem base substitutions was correlated with the age of the  
364 donor using a linear mixed effects regression model. As the number of tandem base  
365 substitutions did not significantly correlate with age in the alcoholic liver ASCs (~0.04 tandem  
366 base substitutions per year; 95% CI: -1.13 - 1.21; two-tailed *t*-test, linear mixed model, non-  
367 significant), we determined whether these tandem base substitution numbers are within the  
368 95% CI of the healthy liver ASCs.

369 Similar to base substitutions and tandem base substitutions, the number of indels was  
370 extracted from the filtered VCF files and extrapolated to the non-N autosomal genome. Using

371 a linear mixed effects regression model with the donor as random effect, we assessed whether  
372 the number of indels was correlated with the age of the donor. Two-tailed *t*-test were performed  
373 to determine whether the correlation was significant for both alcoholic liver ASCs and healthy  
374 liver ASCs.

375

### 376 **Mutational pattern analysis**

377 Mutation types of the base substitutions were extracted from the VCF files and the mutational  
378 profiles were generated by retrieving the sequence context of each base substitution. For the  
379 healthy and alcoholic liver ASCs, we calculated an ‘average’ mutational profile. Pairwise  
380 cosine similarities of these average mutational profiles and of the mutational profile of the trunk  
381 mutations of the HCC were calculated, to identify the similarity between these profiles.

382 We reconstructed the mutational profiles of the average mutational profiles and the  
383 trunk mutations using the 60 known SBS signatures (Supplementary Fig. 3;  
384 <https://cancer.sanger.ac.uk/cosmic/signatures> v3). A bootstrap resampling method similar as  
385 described in Zou *et al.*,<sup>35</sup> was used to generate 120,000 (8 x 15 x 1,000) replicas of the  
386 mutational profiles of the healthy and alcoholic liver ASCs. Subsequently, 8 or 15 (for healthy  
387 and alcoholic liver ASCs respectively) replicas were randomly selected and an average  
388 mutational profile was calculated. This was repeated 10,000 times, to obtain 10,000 average  
389 mutational profiles of the replicas for both healthy and alcoholic livers. These average  
390 mutational profiles of the replicas were reconstructed using the 60 known SBS mutational  
391 signatures and the Euclidean distance to the original signature contribution was calculated for  
392 each reconstructed average mutational profile. Next, the distance at which  $P = 0.01$  was  
393 determined for both healthy and alcoholic liver ASCs ( $d_{\text{healthy}=0.01}$  and  $d_{\text{alcoholic}=0.01}$ ,  
394 respectively). The Euclidean distance ( $d$ ) between the original signature contributions of



395 healthy and alcoholic liver ASCs was considered significant when  $d$  was larger than  $d_{\text{healthy}=0.01}$   
396 and  $d_{\text{alcoholic}=0.01}$ .

397

### 398 **Genomic distribution of somatic base substitutions**

399 The promoter, enhancer, and open chromatin regions of hg19 were obtained from Ensembl  
400 using biomaRt<sup>59,60</sup> and the genic regions of hg19 were loaded from UCSC Known Genes tables  
401 as TxDb object<sup>61</sup>. To determine whether the somatic base substitutions are non-randomly  
402 distributed, we tested for enrichment and depletion of base substitutions in these regions with  
403 a one-sided Binomial test, corrected for the callable/surveyed regions per sample, similar as  
404 described in <sup>24</sup>. For the HCC trunk mutations, the callable regions were obtained by defining  
405 callable loci per biopsy using the GATK CallableLoci tool v3.4.46<sup>58</sup> (optional parameters  
406 ‘minBaseQuality 10’, ‘minMappingQuality 10’, ‘maxFractionOfReadsWithLowMAPQ 20’,  
407 and ‘minDepth 15’). Subsequently, these files were intersected to obtain the regions that are  
408 callable in all biopsies. 96.79% of the non-N autosomal genome was callable in all six biopsies.  
409 Two-sided poisson tests were done to estimate significant differences in depletion/enrichment  
410 in all genomic regions between the healthy liver ASCs, the alcoholic liver ASCs, and the trunk  
411 mutations of the HCC. Differences were considered significant when  $q < 0.05$  (Benjamini-  
412 Hochberg FDR multiple-testing correction). All mutational pattern analyses were performed  
413 using the MutationalPatterns R package<sup>62</sup>.

414 To obtain a generic genome-wide profile of H3K36me3, we downloaded and merged  
415 40 available H3K36me3 ChIP-Seq datasets from UCSC, and determined the median  
416 H3K36me3 values in regions that show H3K36me3 enrichment in at least 2 of the datasets.  
417 H3K36me3 peaks were subsequently called using bdgpeakcall function of MACS2 (broad  
418 peaks)<sup>63</sup>. The amount of base substitutions that overlap with these peaks was calculated for all  
419 base substitutions acquired in liver ASCs. These analyses were repeated for T:A > C:G

420 mutations specifically. Wilcoxon-rank tests were performed to estimate significant differences  
421 in the relative amount of base pair substitutions in H3K36me3 regions between alcoholic and  
422 healthy liver ASCs. Differences with  $P < 0.05$  were considered significant.

423

#### 424 **dN/dS and identification of nonsynonymous base substitutions in cancer genes**

425 dN/dS ratios were computed using the *dNdScv* R package<sup>16</sup>. The output of the *dNdScv* package  
426 was used to identify missense, nonsense, and splice site base substitutions in cosmic cancer  
427 genes. For this analysis, we considered all 409 ‘tier 1’ cancer genes (genes with sufficient  
428 evidence of being a cancer driver). The list of cosmic cancer genes was obtained from  
429 <https://cancer.sanger.ac.uk/cosmic/census>.

430

#### 431 **RNA sequencing**

432 Organoid cultures of three healthy donors (18-c, 21-b, and 22-a) and three alcoholic organoids,  
433 of which 2 with a nonsense base substitution in *PTPRK* (alc3-a and alc5-a) and one without  
434 any base substitutions in *PTPRK* (alc-3b), were cultured for 1 day either in presence or absence  
435 of hEGF in the culture medium. Subsequently, cells were collected in Trizol. Total RNA was  
436 isolated using the QiaSymphony SP with the QiaSymphony RNA kit (Qiagen, 931636). mRNA  
437 sequencing libraries were generated from 50 ng total RNA using the Illumina Neoprep TruSeq  
438 stranded mRNA library prep kit (Illumina, NP-202-1001). RNA libraries were sequenced  
439 paired-end (2 x 75 bp) on the Nextseq500 to > 20 million reads per sample at the Utrecht  
440 Sequencing facility.

441 RNA sequencing reads were mapped to the human reference genome GRCh37 with  
442 STAR v.2.4.2a<sup>64</sup>. The BAM-files were indexed using Sambamba v0.5.8 Subsequently, reads  
443 were counted using HTSeq-count 0.6.1 and read counts were normalized using DESeq v1.18.0.

444 DESeq nbinomTest was used to test for differential expression of *PTPRK* between the  
445 organoids with a nonsense *PTPRK* base substitution and the other organoids.

446

#### 447 **Western blot**

448 Simultaneous to the collection of samples for RNA isolation described above, we also obtained  
449 protein samples for western blot in Laemmli buffer. 20 ug of protein was run on a 10% SDS  
450 page gel and blocked for 1 hour using 5% ELK in TBS-T after transfer to a nitrocellulose  
451 membrane. Subsequently, the membrane was incubated overnight with primary antibody  
452 (pERK AB50011, abcam; ERK AB17942, abcam; Actin A2066, sigma-aldrich) and for 1 hour  
453 at room temperature with secondary antibody. We visualized the proteins with the Amersham  
454 ECL Western blotting analysis system (GE Healthcare, RPN2109).

455

#### 456 **Data availability**

457 The whole-genome sequencing and RNA sequencing data generated during the current study  
458 are available at EGA (<https://www.ebi.ac.uk/ega/home>) under accession number  
459 EGAS00001002983. Filtered VCF-files, metadata, BED-files with callable regions, and RNA-  
460 Seq counts generated during the current study are available at Zenodo under DOI  
461 10.5281/zenodo.3295513 (<https://doi.org/10.5281/zenodo.3295513>). Data analysis scripts  
462 used during the current study are available at <https://github.com/UMCUGenetics/Liverdisease>,  
463 <https://github.com/UMCUGenetics/IAP> and <https://github.com/hartwigmedical>.

464

#### 465 **REFERENCES**

- 466 1. Stewart, B. W. & Wild, C. P. *World Cancer Report 2014*. (2014).
- 467 2. Boffetta, P., Hashibe, M., La Vecchia, C., Zatonski, W. & Rehm, J. The burden of  
468 cancer attributable to alcohol drinking. *International Journal of Cancer* **119**, 884–887

- 469 (2006).
- 470 3. World Health Organization. *Global Status Report on Alcohol and Health*. (World Health  
471 Organization, 2014).
- 472 4. Mizumoto, A. *et al.* Molecular Mechanisms of Acetaldehyde-Mediated Carcinogenesis  
473 in Squamous Epithelium. *Int. J. Mol. Sci.* **18**, (2017).
- 474 5. Obe, G. & Ristow, H. Mutagenic, cancerogenic and teratogenic effects of alcohol.  
475 *Mutat. Res.* **65**, 229–259 (1979).
- 476 6. Helander, A. & Lindahl-Kiessling, K. Increased frequency of acetaldehyde-induced  
477 sister-chromatic exchanges in human lymphocytes treated with an aldehyde  
478 dehydrogenase inhibitor. *Mutat. Res. Lett.* **264**, 103–107 (1991).
- 479 7. Matsuda, T., Kawanishi, M., Matsui, S., Yagi, T. & Takebe, H. Specific tandem GG to  
480 TT base substitutions induced by acetaldehyde are due to intra-strand crosslinks between  
481 adjacent guanine bases. *Nucleic Acids Res.* **26**, 1769–1774 (1998).
- 482 8. Tamura, M., Ito, H., Matsui, H. & Hyodo, I. Acetaldehyde is an oxidative stressor for  
483 gastric epithelial cells. *J. Clin. Biochem. Nutr.* **55**, 26–31 (2014).
- 484 9. Novitskiy, G., Traore, K., Wang, L., Trush, M. A. & Mezey, E. Effects of ethanol and  
485 acetaldehyde on reactive oxygen species production in rat hepatic stellate cells. *Alcohol.*  
486 *Clin. Exp. Res.* **30**, 1429–1435 (2006).
- 487 10. Grollman, A. P. & Moriya, M. Mutagenesis by 8-oxoguanine: an enemy within. *Trends*  
488 *Genet.* **9**, 246–249 (1993).
- 489 11. van Loon, B., Markkanen, E. & Hübscher, U. Oxygen as a friend and enemy: How to  
490 combat the mutational potential of 8-oxo-guanine. *DNA Repair* **9**, 604–616 (2010).
- 491 12. Chang, J. *et al.* Genomic analysis of oesophageal squamous-cell carcinoma identifies  
492 alcohol drinking-related mutation signature and genomic alterations. *Nat. Commun.* **8**,  
493 15290 (2017).

- 494 13. Schulze, K. *et al.* Exome sequencing of hepatocellular carcinomas identifies new  
495 mutational signatures and potential therapeutic targets. *Nat. Genet.* **47**, 505–511 (2015).
- 496 14. Fujimoto, A. *et al.* Whole-genome mutational landscape and characterization of  
497 noncoding and structural mutations in liver cancer. *Nat. Genet.* **48**, 500–509 (2016).
- 498 15. Letouzé, E. *et al.* Mutational signatures reveal the dynamic interplay of risk factors and  
499 cellular processes during liver tumorigenesis. *Nat. Commun.* **8**, 1315 (2017).
- 500 16. Martincorena, I. *et al.* Universal Patterns of Selection in Cancer and Somatic Tissues.  
501 *Cell* **171**, 1029–1041.e21 (2017).
- 502 17. Hernandez–Gea, V., Toffanin, S., Friedman, S. L. & Llovet, J. M. Role of the  
503 Microenvironment in the Pathogenesis and Treatment of Hepatocellular Carcinoma.  
504 *Gastroenterology* **144**, 512–527 (2013).
- 505 18. Zhu, L. *et al.* Multi-organ Mapping of Cancer Risk. *Cell* **166**, 1132–1146.e7 (2016).
- 506 19. Seitz, H. K. & Stickel, F. Molecular mechanisms of alcohol-mediated carcinogenesis.  
507 *Nat. Rev. Cancer* **7**, 599–612 (2007).
- 508 20. Desai, A., Sandhu, S., Lai, J.-P. & Sandhu, D. S. Hepatocellular carcinoma in non-  
509 cirrhotic liver: A comprehensive review. *World Journal of Hepatology* **11**, 1–18 (2019).
- 510 21. Zhu, M. *et al.* Somatic Mutations Increase Hepatic Clonal Fitness and Regeneration in  
511 Chronic Liver Disease. *Cell* (2019). doi:10.1016/j.cell.2019.03.026
- 512 22. Khosla, R. *et al.* EpCAM+ Liver Cancer Stem-Like Cells Exhibiting Autocrine Wnt  
513 Signaling Potentially Originate in Cirrhotic Patients. *Stem Cells Transl. Med.* **6**, 807–  
514 818 (2017).
- 515 23. Chen, D. *et al.* Epithelial to mesenchymal transition is involved in ethanol promoted  
516 hepatocellular carcinoma cells metastasis and stemness. *Mol. Carcinog.* **57**, 1358–1370  
517 (2018).
- 518 24. Blokzijl, F. *et al.* Tissue-specific mutation accumulation in human adult stem cells

- 519 during life. *Nature* **538**, 260–264 (2016).
- 520 25. Jager, M. *et al.* Measuring mutation accumulation in single human adult stem cells by  
521 whole-genome sequencing of organoid cultures. *Nat. Protoc.* **13**, 59–78 (2018).
- 522 26. Barker, N. *et al.* Crypt stem cells as the cells-of-origin of intestinal cancer. *Nature* **457**,  
523 608–611 (2009).
- 524 27. Adams, P. D., Jasper, H. & Rudolph, K. L. Aging-Induced Stem Cell Mutations as  
525 Drivers for Disease and Cancer. *Cell Stem Cell* **16**, 601–612 (2015).
- 526 28. Lee, J.-S. *et al.* A novel prognostic subtype of human hepatocellular carcinoma derived  
527 from hepatic progenitor cells. *Nat. Med.* **12**, 410–416 (2006).
- 528 29. Tummala, K. S. *et al.* Hepatocellular Carcinomas Originate Predominantly from  
529 Hepatocytes and Benign Lesions from Hepatic Progenitor Cells. *Cell Rep.* **19**, 584–600  
530 (2017).
- 531 30. Holczbauer, Á. *et al.* Modeling pathogenesis of primary liver cancer in lineage-specific  
532 mouse cell types. *Gastroenterology* **145**, 221–231 (2013).
- 533 31. Mu, X. *et al.* Hepatocellular carcinoma originates from hepatocytes and not from the  
534 progenitor/biliary compartment. *Journal of Clinical Investigation* **125**, 3891–3903  
535 (2015).
- 536 32. Alexandrov, L. B. *et al.* Signatures of mutational processes in human cancer. *Nature*  
537 **500**, 415–421 (2013).
- 538 33. Nik-Zainal, S. *et al.* Landscape of somatic mutations in 560 breast cancer whole-genome  
539 sequences. *Nature* **534**, 47–54 (2016).
- 540 34. Alexandrov, L. B. *et al.* The Repertoire of Mutational Signatures in Human Cancer.  
541 *bioRxiv* 322859 (2018). doi:10.1101/322859
- 542 35. Zou, X. *et al.* Validating the concept of mutational signatures with isogenic cell models.  
543 *Nat. Commun.* **9**, 1744 (2018).

- 544 36. Yokoyama, A. *et al.* Age-related remodelling of oesophageal epithelia by mutated  
545 cancer drivers. *Nature* **565**, 312–317 (2019).
- 546 37. Supek, F. & Lehner, B. Clustered Mutation Signatures Reveal that Error-Prone DNA  
547 Repair Targets Mutations to Active Genes. *Cell* **170**, 534–547.e23 (2017).
- 548 38. Barski, A. *et al.* High-resolution profiling of histone methylations in the human genome.  
549 *Cell* **129**, 823–837 (2007).
- 550 39. Bannister, A. J. *et al.* Spatial distribution of di- and tri-methyl lysine 36 of histone H3 at  
551 active genes. *J. Biol. Chem.* **280**, 17732–17736 (2005).
- 552 40. Xu, Y., Tan, L.-J., Grachtchouk, V., Voorhees, J. J. & Fisher, G. J. Receptor-type  
553 protein-tyrosine phosphatase-kappa regulates epidermal growth factor receptor function.  
554 *J. Biol. Chem.* **280**, 42694–42700 (2005).
- 555 41. Luedde, T., Kaplowitz, N. & Schwabe, R. F. Cell death and cell death responses in liver  
556 disease: mechanisms and clinical relevance. *Gastroenterology* **147**, 765–783.e4 (2014).
- 557 42. Lu, W.-Y. *et al.* Hepatic progenitor cells of biliary origin with liver repopulation  
558 capacity. *Nat. Cell Biol.* **17**, 971–983 (2015).
- 559 43. Sun, P.-H., Ye, L., Mason, M. D. & Jiang, W. G. Protein tyrosine phosphatase kappa  
560 (PTPRK) is a negative regulator of adhesion and invasion of breast cancer cells, and  
561 associates with poor prognosis of breast cancer. *J. Cancer Res. Clin. Oncol.* **139**, 1129–  
562 1139 (2013).
- 563 44. Flavell, J. R. *et al.* Down-regulation of the TGF-beta target gene, PTPRK, by the  
564 Epstein-Barr virus encoded EBNA1 contributes to the growth and survival of Hodgkin  
565 lymphoma cells. *Blood* **111**, 292–301 (2008).
- 566 45. Zhong, J.-H. *et al.* Epidermal Growth Factor Gene Polymorphism and Risk of  
567 Hepatocellular Carcinoma: A Meta-Analysis. *PLoS One* **7**, e32159 (2012).
- 568 46. Tanabe, K. K. *et al.* Epidermal growth factor gene functional polymorphism and the risk

- 569 of hepatocellular carcinoma in patients with cirrhosis. *JAMA* **299**, 53–60 (2008).
- 570 47. Sanchez-Vega, F. *et al.* Oncogenic Signaling Pathways in The Cancer Genome Atlas.  
571 *Cell* **173**, 321–337.e10 (2018).
- 572 48. Schiffer, E. *et al.* Gefitinib, an EGFR inhibitor, prevents hepatocellular carcinoma  
573 development in the rat liver with cirrhosis. *Hepatology* **41**, 307–314 (2005).
- 574 49. Mantovani, A., Allavena, P., Sica, A. & Balkwill, F. Cancer-related inflammation.  
575 *Nature* **454**, 436–444 (2008).
- 576 50. Shimizu, T., Marusawa, H., Endo, Y. & Chiba, T. Inflammation-mediated genomic  
577 instability: roles of activation-induced cytidine deaminase in carcinogenesis. *Cancer Sci.*  
578 **103**, 1201–1206 (2012).
- 579 51. Broutier, L. *et al.* Culture and establishment of self-renewing human and mouse adult  
580 liver and pancreas 3D organoids and their genetic manipulation. *Nat. Protoc.* **11**, 1724–  
581 1743 (2016).
- 582 52. Huch, M. *et al.* Long-term culture of genome-stable bipotent stem cells from adult  
583 human liver. *Cell* **160**, 299–312 (2015).
- 584 53. Li, H. & Durbin, R. Fast and accurate short read alignment with Burrows-Wheeler  
585 transform. *Bioinformatics* **25**, 1754–1760 (2009).
- 586 54. Boeva, V. *et al.* Control-FREEC: a tool for assessing copy number and allelic content  
587 using next-generation sequencing data. *Bioinformatics* **28**, 423–425 (2012).
- 588 55. Chen, X. *et al.* Manta: rapid detection of structural variants and indels for germline and  
589 cancer sequencing applications. *Bioinformatics* **32**, 1220–1222 (2016).
- 590 56. Quinlan, A. R. BEDTools: The Swiss-Army Tool for Genome Feature Analysis. *Curr.*  
591 *Protoc. Bioinformatics* **47**, 11.12.1–34 (2014).
- 592 57. McKenna, A. *et al.* The Genome Analysis Toolkit: a MapReduce framework for  
593 analyzing next-generation DNA sequencing data. *Genome Res.* **20**, 1297–1303 (2010).



- 594 58. Van der Auwera, G. A. *et al.* From FastQ data to high confidence variant calls: the  
595 Genome Analysis Toolkit best practices pipeline. *Curr. Protoc. Bioinformatics* **43**,  
596 11.10.1–33 (2013).
- 597 59. Durinck, S. *et al.* BioMart and Bioconductor: a powerful link between biological  
598 databases and microarray data analysis. *Bioinformatics* **21**, 3439–3440 (2005).
- 599 60. Durinck, S., Spellman, P. T., Birney, E. & Huber, W. Mapping identifiers for the  
600 integration of genomic datasets with the R/Bioconductor package biomaRt. *Nat. Protoc.*  
601 **4**, 1184–1191 (2009).
- 602 61. Carlson, M. & Maintainer, B. P. *TxDb.Hsapiens.UCSC.hg19.knownGene: Annotation*  
603 *package for TxDb object(s)*. (2015).
- 604 62. Blokzijl, F., Janssen, R., van Boxtel, R. & Cuppen, E. MutationalPatterns:  
605 comprehensive genome-wide analysis of mutational processes. *Genome Med.* **10**, 33  
606 (2018).
- 607 63. Zhang, Y. *et al.* Model-based analysis of ChIP-Seq (MACS). *Genome Biol.* **9**, R137  
608 (2008).
- 609 64. Dobin, A. *et al.* STAR: ultrafast universal RNA-seq aligner. *Bioinformatics* **29**, 15–21  
610 (2013).

611

## 612 **ACKNOWLEDGEMENTS**

613 The authors would like to thank the Utrecht Sequencing Facility and the UBEC for sequencing  
614 and for input on the bioinformatic analyses, respectively. The UBEC is subsidized by the  
615 University Medical Center Utrecht and the Utrecht Sequencing Facility is subsidized by the  
616 University Medical Center Utrecht, Hubrecht Institute, and Utrecht University. This study was  
617 financially supported by the research program InnoSysTox (project number 114027003), by  
618 the Netherlands Organisation for Health Research and Development (ZonMw), by the Dutch

619 Cancer Society (project number 10496) and is part of the OncoCode Institute, which is partly  
620 financed by the Dutch Cancer Society and was funded by the Gravitation program  
621 CancerGenomiCs.nl from the Netherlands Organisation for Scientific Research (NWO). We  
622 thank the Hartwig Medical Foundation (Amsterdam, The Netherlands) for generating,  
623 analyzing and providing access to reference whole genome sequencing data of the Netherlands  
624 population.

625

## 626 **AUTHOR CONTRIBUTIONS**

627 R.L., J.J., J.I., M.D., and M.V. collected liver biopsies. M.J., E.K., and N.B. performed  
628 organoid culturing. N.B. isolated the RNA and protein, prepared RNA-seq libraries of the  
629 organoid cultures and performed Western blot. M.J., M.L., B.R., R.J., and S.B. performed  
630 bioinformatic analyses. M.J., E.K., M.V., R.B., L.L., and E.C. were involved in the conceptual  
631 design of this study. M.J. and E.C. wrote the manuscript. All authors provided textual  
632 comments and have approved the manuscript. R.B., L.L., and E.C. supervised this study.

633

## 634 **AUTHOR INFORMATION**

### 635 **Competing interests**

636 The authors declare no competing interests.

637

### 638 **Corresponding authors**

639 Correspondence to Edwin Cuppen.

640 **TABLES**

| Gene           | Entrez<br>gene ID | Sample type     | Sample(s)      | Mutation type      | <i>q</i><br>(missense) | <i>q</i><br>(nonsense) |
|----------------|-------------------|-----------------|----------------|--------------------|------------------------|------------------------|
| <i>ATP1A1</i>  | 476               | Healthy liver   | 15-a           | missense           | 1.00                   | 1.00                   |
| <i>PAX7</i>    | 5081              | Healthy liver   | 21-a           | missense           | 1.00                   | 1.00                   |
| <i>PREX2</i>   | 80243             | Healthy liver   | 21-b           | missense           | 1.00                   | 1.00                   |
| <i>PTPRK</i>   | 5796              | Alcoholic liver | alc3-a, alc5-a | nonsense, nonsense | 1.00                   | 0.02                   |
| <i>ALK</i>     | 238               | Alcoholic liver | alc3-b         | missense           | 1.00                   | 1.00                   |
| <i>CACNA1D</i> | 776               | Alcoholic liver | alc3-b         | missense           | 1.00                   | 1.00                   |
| <i>ZNF331</i>  | 55422             | Alcoholic liver | alc4-b         | missense           | 1.00                   | 1.00                   |
| <i>CUX1</i>    | 1523              | Alcoholic liver | alc5-a         | missense           | 1.00                   | 1.00                   |
| <i>TERT</i>    | 7015              | Alcoholic liver | alc5-a         | missense           | 1.00                   | 1.00                   |
| <i>CD274</i>   | 29126             | HCC             | HCC-trunk      | missense           | 1.00                   | 1.00                   |
| <i>CIITA</i>   | 4261              | HCC             | HCC-trunk      | missense           | 1.00                   | 1.00                   |
| <i>KLF4</i>    | 9314              | HCC             | HCC-trunk      | missense           | 1.00                   | 1.00                   |
| <i>MUC1</i>    | 4582              | HCC             | HCC-trunk      | missense           | 1.00                   | 1.00                   |

641

642 **Table 1** Somatic missense and nonsense base substitutions in cancer genes observed in healthy liver

643 ASCs, alcoholic liver ASCs, and the MRCA of an HCC. *q* values (likelihood ratio test, FDR correction)

644 indicate significant enrichment of nonsynonymous base substitutions within genes.



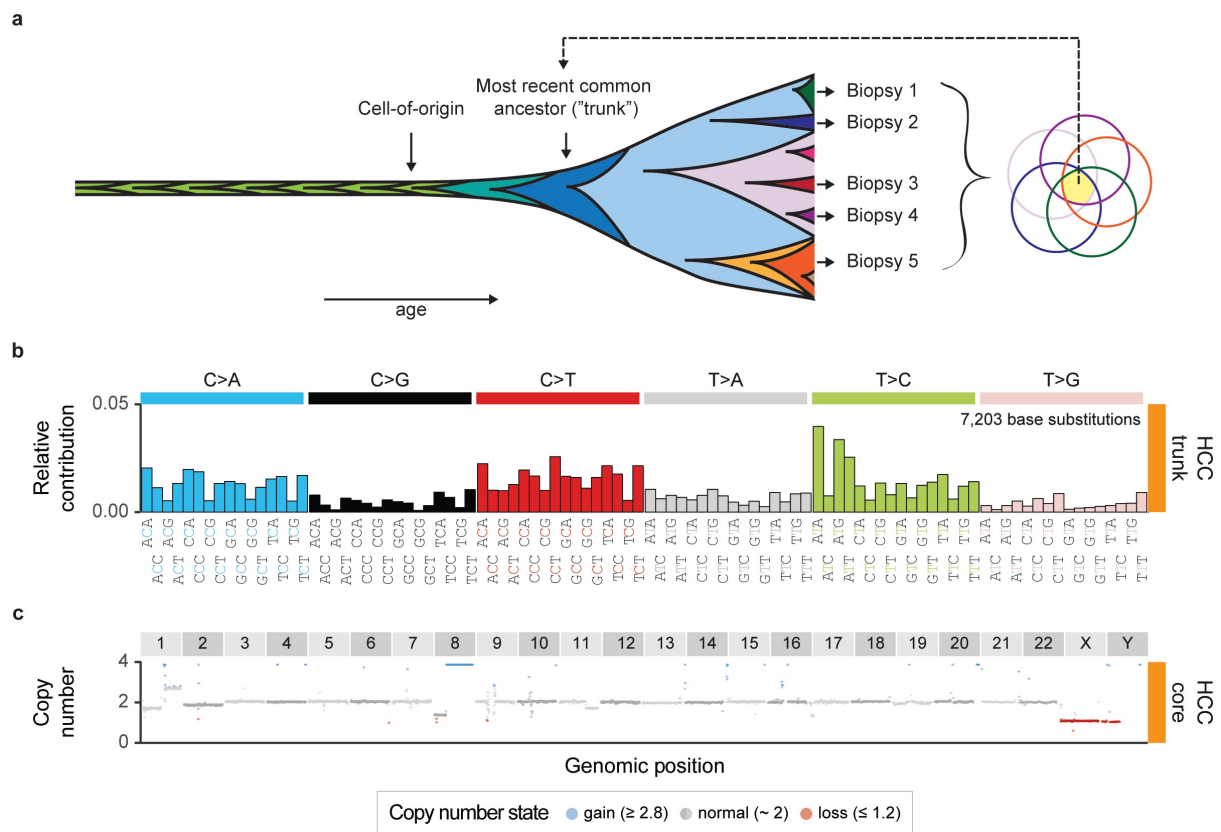

654

655 **Fig. 2** Somatic mutations in the most recent common ancestor of an HCC in a patient with a history of  
 656 chronic alcohol intake. **a** Mutations that accumulated in the most recent common ancestor ("trunk") can  
 657 be identified, by determining the mutations that are shared by multiple biopsies (in yellow). Five  
 658 biopsies across a 13cm HCC were sequenced to identify the trunk mutations. **b** Relative contribution of  
 659 96 context-dependent base substitution types to the mutational profile of the recent common ancestor  
 660 of an HCC. **c** Genomic copy number profile of one of the HCC biopsies (HCC-core), which is  
 661 representative for all biopsies (Supplementary Fig. 4c).

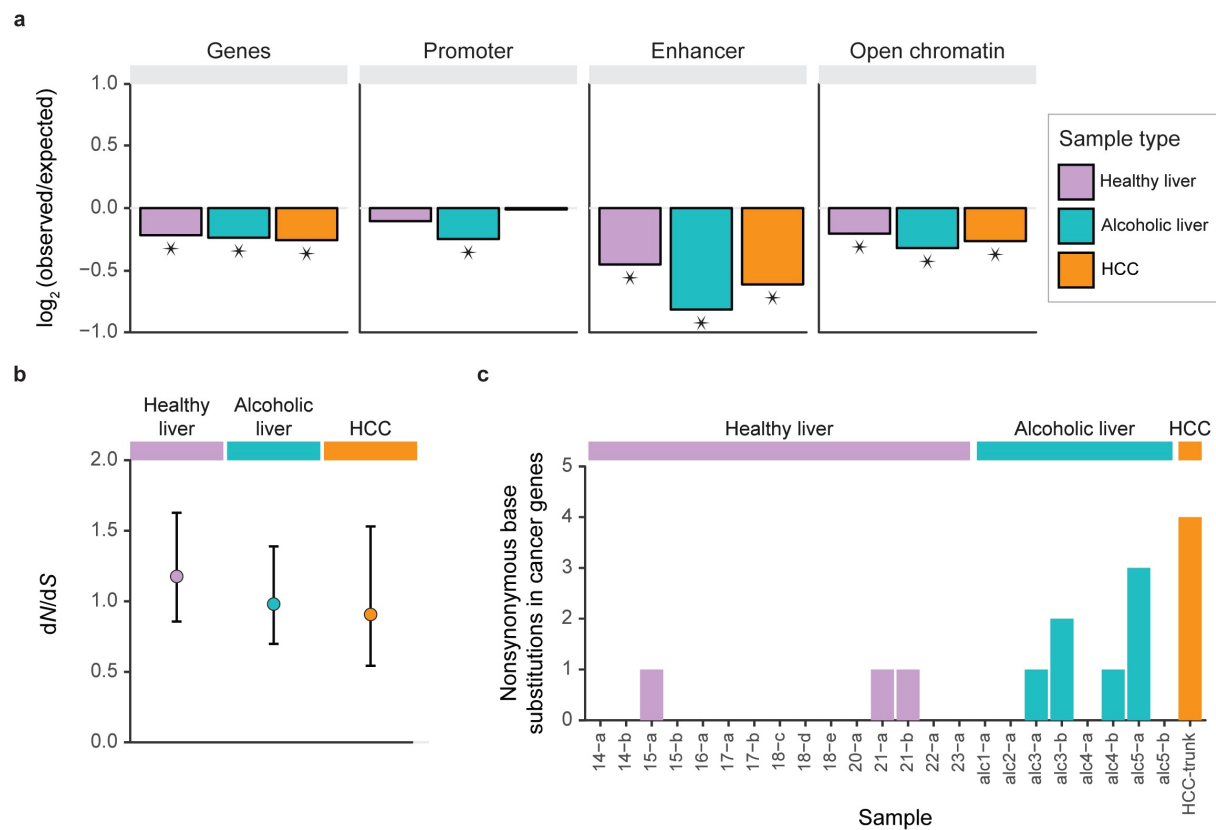

662

663 **Fig. 3** Genomic distribution of the somatic base substitutions acquired in healthy liver stem cells,

664 alcoholic liver stem cells, and the most recent common ancestor of an HCC. **a** The effect size of the

665 depletion of somatic base substitutions in genes, promoters, enhancers, and open chromatin regions.

666 Asterisks indicate significant depletion. **b** dN/dS of the somatic base substitutions in genes in the

667 indicated sample types. Data points represent the Maximum-likelihood estimates and error bars

668 represent the 95% confidence intervals. **c** Number of nonsynonymous base substitutions in cancer genes

669 in each indicated sample.

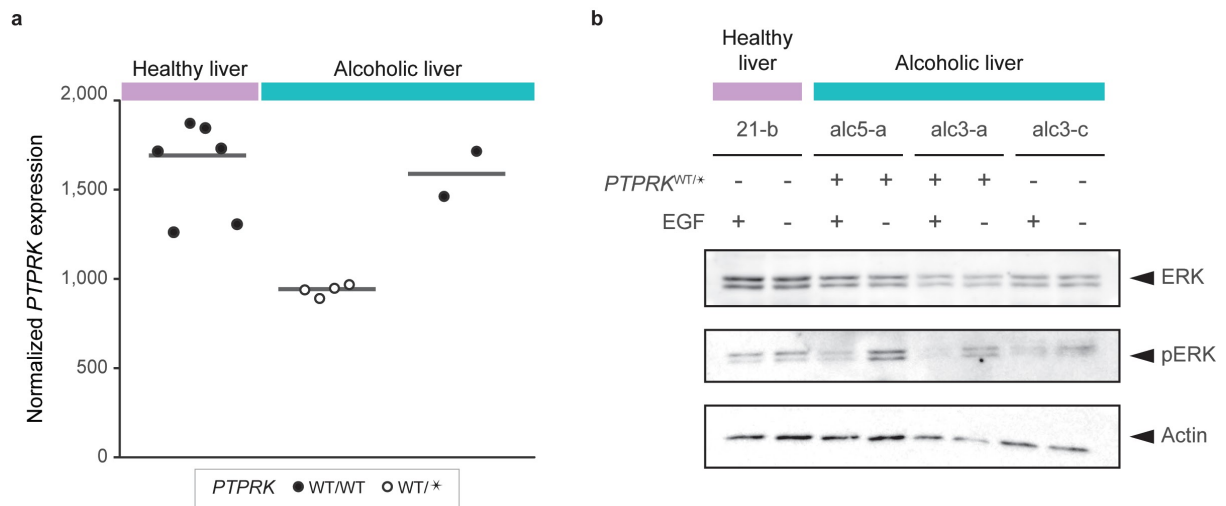

670

671 **Fig. 4** Functional consequences of nonsense *PTPRK* base substitutions. **a** Normalized *PTPRK* mRNA

672 expression in alcoholic *PTPRK*<sup>WT/\*</sup>, healthy *PTPRK*<sup>WT/WT</sup> and alcoholic *PTPRK*<sup>WT/WT</sup> liver organoid

673 cultures. Normalized counts were calculated for duplicate measures of 2 alcoholic *PTPRK*<sup>WT/\*</sup>, 3

674 healthy *PTPRK*<sup>WT/WT</sup>, and 1 alcoholic *PTPRK*<sup>WT/WT</sup> organoid cultures. Each data point represents a

675 single measurement. Lines indicate median *PTPRK* expression per sample type. WT = wildtype, \* =

676 nonsense base substitution. **b** Western blot of ERK, pERK and actin in organoid cultures of *PTPRK*<sup>WT/\*</sup>

677 livers and healthy and alcoholic *PTPRK*<sup>WT/WT</sup> liver cultures with and without EGF in the culturing

678 medium.
